# Supplementary material for: SO2 Poisoning Behaviors of Ca‐Mn/TiO2 Catalysts for Selective Catalytic Reduction of NO with NH3 at Low Temperature
Source: Hindawi journal article supplement (doi:10.1155/2014/904649), 2014-01-01
Supplement: f1 [file 904649.f1.pdf]

**SO<sub>2</sub> poisoning behaviors of Ca-Mn/TiO<sub>2</sub> catalysts for selective catalytic  
reduction of NO with NH<sub>3</sub> at low temperature**

Qingqing Tian<sup>1,2</sup>, Hongfeng Liu<sup>1,2</sup>, Weiyuan Yao<sup>1,2</sup>, Yan Wang<sup>1,2</sup>, Yue Liu<sup>1,2\*</sup>, Zhongbiao  
Wu<sup>1,2</sup>, Haiqiang Wang<sup>1,2</sup>, Xiaole Weng<sup>1,2</sup>

<sup>1</sup>Department of Environmental Engineering, Zhejiang University, Hangzhou 310058, PR China

<sup>2</sup>Zhejiang Provincial Engineering Research Center of Industrial Boiler & Furnace Flue-gas Pollution Control,  
Hangzhou 310058, PR China

---

\*Corresponding author. Tel.: +86-571-87953088; Fax: +86-571-87953088.

E-mail: yueliu@zju.edu.cn (Y. Liu)

Full postal address: Department of Environmental Engineering, Zijingang Campus, Zhejiang  
University, Yuhangtang Road 388, Hangzhou 310058, PR China.

**Table. S1.** Physical properties of Mn/TiO<sub>2</sub> and Ca(0.1)-Mn/TiO<sub>2</sub> before and after SCR reaction in the presence of SO<sub>2</sub>.

| Samples                           | BET surface area<br>(m <sup>2</sup> /g) | Pore volume<br>(×10 <sup>-2</sup> cm <sup>3</sup> /g) | Pore diameter (nm) |
|-----------------------------------|-----------------------------------------|-------------------------------------------------------|--------------------|
| Fresh Mn/TiO <sub>2</sub>         | 46.78                                   | 15.94                                                 | 9.30               |
| Used Mn/TiO <sub>2</sub>          | 45.64                                   | 15.01                                                 | 8.87               |
| Fresh Ca(0.1)-Mn/TiO <sub>2</sub> | 84.77                                   | 19.91                                                 | 6.57               |
| Used Ca(0.1)-Mn/TiO <sub>2</sub>  | 84.37                                   | 18.90                                                 | 6.87               |

**Table. S2.** Surface atomic contents of Mn/TiO<sub>2</sub> and Ca(0.1)-Mn/TiO<sub>2</sub> before and after SCR reaction.

| Catalysts                         | Surface Atomic Concentrations (%) |       |       |      |      |
|-----------------------------------|-----------------------------------|-------|-------|------|------|
|                                   | Mn                                | Ti    | O     | Ca   | S    |
| Fresh Mn/TiO <sub>2</sub>         | 10.98                             | 19.30 | 69.72 | —    | —    |
| Used Mn/TiO <sub>2</sub>          | 11.55                             | 15.25 | 70.34 | —    | 2.87 |
| Fresh Ca(0.1)-Mn/TiO <sub>2</sub> | 10.65                             | 17.44 | 69.57 | 2.34 | —    |
| Used Ca(0.1)-Mn/TiO <sub>2</sub>  | 8.80                              | 18.89 | 69.59 | 1.40 | 0.89 |
